# Supplementary material
Source: HighWire-hosted journal article supplement (https://erj.ersjournals.com/content/60/3/2200763)
Supplement: inline-supplementary-material-1 [file inline-supplementary-material-1.pdf]

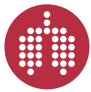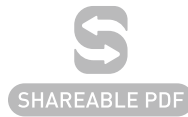

## More than meets the eye

Gerard N. Olive <sup>1,2</sup>, Ian A. Yang <sup>1,2</sup>, Henry Marshall <sup>1,2</sup>, Rayleen V. Bowman<sup>1,2</sup> and Kwun M. Fong <sup>1,2</sup>

<sup>1</sup>Thoracic Medicine, The Prince Charles Hospital, Brisbane, Australia. <sup>2</sup>UQ Thoracic Research Centre, Faculty of Medicine, The University of Queensland, Brisbane, Australia.

Corresponding author: Kwun M. Fong ([Kwun.fong@health.qld.gov.au](mailto:Kwun.fong@health.qld.gov.au))

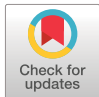

Shareable abstract (@ERSpublications)

**Autofluorescence bronchoscopy can detect proximal preneoplastic lesions. Intensive surveillance with this modality, however, may not alter health outcomes.** <https://bit.ly/3s98vN1>

**Cite this article as:** Olive GN, Yang IA, Marshall H, *et al.* More than meets the eye. *Eur Respir J* 2022; 60: 2200763 [DOI: 10.1183/13993003.00763-2022].

This single-page version can be shared freely online.

Copyright ©The authors 2022.  
For reproduction rights and  
permissions contact  
[permissions@ersnet.org](mailto:permissions@ersnet.org)

Received: 20 April 2022  
Accepted: 27 April 2022

Lung cancer biology has changed, with a histological shift from the previously dominant central squamous cell carcinoma to peripheral lung adenocarcinomas. Changes in cigarette characteristics and smoking practice are commonly attributed; however, other carcinogens such as air pollution and diesel fumes may also play an as yet unidentified role in lung cancers in never-smokers [1]. This shift and advances in cross sectional imaging have resulted in increasing adoption of low dose computed tomography (CT)-based lung cancer screening, when earlier attempts with chest radiography and sputum cytology failed [2].
